# Supplementary material for: Telephone instructions improve the quality of bowel preparation for colonoscopy: A meta-analysis of randomized controlled trials
Source: PubMed Central journal article supplement (PMC10664946; doi:10.1371/journal.pone.0289063), 2023-11-22
Supplement: pone.0289063.s002.pdf [file pone.0289063.s002.pdf]

## Telephone instructions for colonoscopy bowel preparation

**Patient or population:** Patients undergoing colonoscopy

**Setting:** Bowel preparation

**Intervention:** Telephone instructions

**Comparison:** Standard instructions

| Outcomes                                          | № of participants (studies) Follow-up | Certainty of the evidence (GRADE) | Relative effect (95% CI)         | Anticipated absolute effects                |                                                       |
|---------------------------------------------------|---------------------------------------|-----------------------------------|----------------------------------|---------------------------------------------|-------------------------------------------------------|
|                                                   |                                       |                                   |                                  | Risk with Standard instructions             | Risk difference with Telephone instructions           |
| Rate of adequate bowel preparation                | 3652 (9 RCTs)                         | ⊕⊕○○<br>Low <sup>a,b</sup>        | <b>RR 1.17</b><br>(1.05 to 1.30) | 781 per 1,000                               | <b>133 more per 1,000</b><br>(39 more to 234 more)    |
| Total BBPS score                                  | 725 (3 RCTs)                          | ⊕⊕○○<br>Low <sup>a,b</sup>        | -                                | The mean total BBPS score was <b>0</b>      | MD <b>1.32 higher</b><br>(0.15 higher to 2.49 higher) |
| Total OBPS score                                  | 657 (2 RCTs)                          | ⊕⊕⊕⊕<br>High                      | -                                | The mean total OBPS score was <b>0</b>      | MD <b>1.93 lower</b><br>(2.35 lower to 1.51 lower)    |
| Cecal intubation rate                             | 2153 (7 RCTs)                         | ⊕⊕○○<br>Low <sup>a,b</sup>        | <b>RR 1.06</b><br>(1.01 to 1.11) | 901 per 1,000                               | <b>54 more per 1,000</b><br>(9 more to 99 more)       |
| Polyp detection rate (PDR)                        | 1592 (6 RCTs)                         | ⊕⊕○○<br>Low <sup>a,b</sup>        | <b>RR 1.58</b><br>(1.23 to 2.04) | 273 per 1,000                               | <b>159 more per 1,000</b><br>(63 more to 284 more)    |
| Adenoma detection rate (ADR)                      | 1539 (6 RCTs)                         | ⊕⊕○○<br>Low <sup>a,b</sup>        | <b>RR 1.37</b><br>(0.97 to 1.94) | 271 per 1,000                               | <b>100 more per 1,000</b><br>(8 fewer to 254 more)    |
| Cecal intubation time                             | 1382 (5 RCTs)                         | ⊕⊕○○<br>Low <sup>a,b</sup>        | -                                | The mean cecal intubation time was <b>0</b> | MD <b>0.6 lower</b><br>(1.76 lower to 0.56 higher)    |
| Withdrawal time                                   | 1382 (5 RCTs)                         | ⊕⊕⊕○<br>Moderate <sup>a</sup>     | -                                | The mean withdrawal time was <b>0</b>       | MD <b>1.15 lower</b><br>(1.56 lower to 0.73 lower)    |
| Abdominal pain                                    | 1270 (4 RCTs)                         | ⊕⊕○○<br>Low <sup>a,c</sup>        | <b>RR 1.06</b><br>(0.72 to 1.56) | 70 per 1,000                                | <b>4 more per 1,000</b><br>(20 fewer to 39 more)      |
| Abdominal distension                              | 1012 (3 RCTs)                         | ⊕⊕⊕○<br>Moderate <sup>c</sup>     | <b>RR 0.85</b><br>(0.63 to 1.15) | 156 per 1,000                               | <b>23 fewer per 1,000</b><br>(58 fewer to 23 more)    |
| Nausea                                            | 1270 (4 RCTs)                         | ⊕⊕○○<br>Low <sup>a,c</sup>        | <b>RR 1.06</b><br>(0.88 to 1.28) | 232 per 1,000                               | <b>14 more per 1,000</b><br>(28 fewer to 65 more)     |
| Vomiting                                          | 1070 (3 RCTs)                         | ⊕⊕○○<br>Low <sup>a,c</sup>        | <b>RR 0.78</b><br>(0.41 to 1.49) | 72 per 1,000                                | <b>16 fewer per 1,000</b><br>(43 fewer to 35 more)    |
| Patient's willingness to repeat bowel preparation | 1270 (4 RCTs)                         | ⊕⊕○○<br>Low <sup>a,b</sup>        | <b>RR 1.09</b><br>(0.96 to 1.23) | 630 per 1,000                               | <b>57 more per 1,000</b><br>(25 fewer to 145 more)    |

\*The risk in the intervention group (and its 95% confidence interval) is based on the assumed risk in the comparison group and the **relative effect** of the intervention (and its 95% CI).

CI: confidence interval; MD: mean difference; RR: risk ratio

### GRADE Working Group grades of evidence

**High certainty:** we are very confident that the true effect lies close to that of the estimate of the effect.

**Moderate certainty:** we are moderately confident in the effect estimate: the true effect is likely to be close to the estimate of the effect, but there is a possibility that it is substantially different.

**Low certainty:** our confidence in the effect estimate is limited: the true effect may be substantially different from the estimate of the effect.

**Very low certainty:** we have very little confidence in the effect estimate: the true effect is likely to be substantially different from the estimate of effect.

### Explanations

a. One study had a large number of lost patients

b. P value was large

c. Total number of events was less than 300.
